# Supplementary material
Source: ML conference proceedings conference paper supplement (https://openaccess.thecvf.com/content/ICCV_2019/html/Kazakos_EPIC-Fusion_Audio-Visual_Temporal_ICCV_2019_paper.html)
Supplement: Supplementary file 1 [file Kazakos_EPIC-Fusion_Audio-Visual_Temporal_ICCV_2019_supplemental.pdf]

Archive with 5 entries (4 files):
- TBN_video.mp4
- __MACOSX/
- __MACOSX/._TBN_video.mp4
- supplementary.pdf
- __MACOSX/._supplementary.pdf
