# Supplementary material
Source: ML conference proceedings conference paper supplement (https://openaccess.thecvf.com/content/ICCV_2019/html/Kazakos_EPIC-Fusion_Audio-Visual_Temporal_ICCV_2019_paper.html)
Supplement: Supplementary file 1 [file Kazakos_EPIC-Fusion_Audio-Visual_Temporal_ICCV_2019_supplemental.pdf › supplementary.pdf]

# EPIC-Fusion: Audio-Visual Temporal Binding for Egocentric Action Recognition – Supplementary Materials

Evangelos Kazakos<sup>1</sup> Arsha Nagrani<sup>2</sup> Andrew Zisserman<sup>2</sup> Dima Damen<sup>1</sup>

<sup>1</sup>Visual Information Lab, University of Bristol <sup>2</sup>Visual Geometry Group, University of Oxford

This additional material includes a description of the qualitative examples in the supplementary video in Sec 1. This is followed by the leaderboard results in Sec 2. We further analyse per-class results with and without audio in Sec 3.

## 1. Qualitative results

We show selected qualitative results on a held-out validation set, from the publicly available training videos. We hold-out 14 (untrimmed) videos from the training set, for qualitative examples. Please refer to the attached video. For each, we show the ground truth, and the predictions of individual modalities (RGB, Flow, Audio) compared with our TBN (Single Model).

## 2. Action Recognition Challenge - Public Leaderboard Results

In Fig. 1, we show results for **Ours (TBN, Single Model)** and **Ours (TBN, Ensemble)**, as they appeared on the public leaderboard of the EPIC-Kitchens - Action recognition challenge on CodaLab at the time of submission (March 22nd 2019). As noted in the paper, the single model TBN outperforms all other submissions by a clear margin, on both test sets **S1** and **S2**, and the results are further improved using an ensemble of TBNs trained with different TBW widths.

As the challenge concluded, our model (TBN\_Ensemble) is ranked 2nd in the leaderboard. A snapshot of the leaderboard for the 2019 challenge is available at <https://epic-kitchens.github.io/2019#results>.

## 3. Per-class Multi-modal Fusion Results

A complete version of Fig 5 in the manuscript is available in Fig 2 here. It shows the confusion matrices with-out and with the utilisation of audio for the largest-15 verb and noun classes (in **S1**). The first confusion matrix show TBN (RGB+Flow), and the second shows TBN (RGB+Flow+Audio). Studying the difference (Fig 2 right) clearly demonstrates an increase (blue) in confidence along the diagonal, and a decrease (red) in confusion elsewhere.

| Seen Kitchens (S1) |                   |         |                    |           |                    |       |        |                    |       |        |               |       |        |            |       |        |
|--------------------|-------------------|---------|--------------------|-----------|--------------------|-------|--------|--------------------|-------|--------|---------------|-------|--------|------------|-------|--------|
| #                  | User              | Entries | Date of Last Entry | Team Name | Top-1 Accuracy (%) |       |        | Top-5 Accuracy (%) |       |        | Precision (%) |       |        | Recall (%) |       |        |
|                    |                   |         |                    |           | Verb               | Noun  | Action | Verb               | Noun  | Action | Verb          | Noun  | Action | Verb       | Noun  | Action |
| 1                  | TBN_Ensemble      | 1       | 03/22/19           |           | 66.10              | 47.88 | 36.66  | 91.28              | 72.80 | 58.62  | 60.73         | 44.89 | 24.01  | 46.81      | 43.88 | 22.92  |
|                    |                   |         |                    |           | (1)                | (1)   | (1)    | (1)                | (1)   | (1)    | (2)           | (1)   | (1)    | (1)        | (1)   | (1)    |
| 2                  | TBN_Single_Model  | 1       | 03/22/19           |           | 64.74              | 46.03 | 34.80  | 90.69              | 71.33 | 56.64  | 55.66         | 43.65 | 22.06  | 45.55      | 42.30 | 21.30  |
|                    |                   |         |                    |           | (2)                | (2)   | (2)    | (2)                | (2)   | (2)    | (3)           | (2)   | (2)    | (2)        | (2)   | (2)    |
| 3                  | zolfagha          | 7       | 10/18/18           |           | 55.08              | 35.50 | 23.08  | 84.81              | 60.92 | 42.91  | 42.98         | 31.02 | 14.68  | 34.08      | 33.84 | 13.99  |
|                    |                   |         |                    |           | (3)                | (5)   | (3)    | (4)                | (6)   | (4)    | (6)           | (5)   | (3)    | (3)        | (3)   | (3)    |
| 4                  | EPIC_TSN_Fusion   | 1       | 09/04/18           |           | 48.23              | 36.71 | 20.54  | 84.09              | 62.32 | 39.79  | 47.26         | 35.42 | 11.57  | 22.33      | 30.53 | 9.78   |
|                    |                   |         |                    |           | (4)                | (4)   | (4)    | (6)                | (4)   | (6)    | (5)           | (3)   | (5)    | (7)        | (5)   | (5)    |
| 5                  | masterchef        | 1       | 10/02/18           |           | 43.51              | 32.94 | 20.19  | 84.38              | 61.66 | 43.57  | 28.42         | 27.99 | 7.62   | 24.18      | 26.83 | 8.85   |
|                    |                   |         |                    |           | (7)                | (6)   | (5)    | (5)                | (5)   | (3)    | (9)           | (8)   | (7)    | (5)        | (7)   | (7)    |
| 6                  | EPIC_TSN_RGB      | 1       | 09/04/18           |           | 45.68              | 36.80 | 19.86  | 85.56              | 64.19 | 41.89  | 61.64         | 34.32 | 11.02  | 23.81      | 31.62 | 9.76   |
|                    |                   |         |                    |           | (5)                | (3)   | (6)    | (3)                | (3)   | (5)    | (1)           | (4)   | (6)    | (6)        | (4)   | (6)    |
| 7                  | zhun              | 4       | 01/09/19           |           | 43.59              | 31.12 | 17.94  | 83.10              | 55.37 | 33.37  | 48.16         | 27.71 | 12.72  | 24.90      | 27.91 | 10.32  |
|                    |                   |         |                    |           | (6)                | (7)   | (7)    | (7)                | (7)   | (8)    | (4)           | (9)   | (4)    | (4)        | (6)   | (4)    |
| 8                  | EPIC_2SCNN_RGB    | 2       | 09/06/18           |           | 40.44              | 30.46 | 13.67  | 83.04              | 57.05 | 33.25  | 34.74         | 28.23 | 6.66   | 15.90      | 23.23 | 5.47   |
|                    |                   |         |                    |           | (10)               | (8)   | (8)    | (8)                | (7)   | (8)    | (7)           | (7)   | (8)    | (8)        | (8)   | (8)    |
| 9                  | EPIC_2SCNN_Fusion | 1       | 09/06/18           |           | 42.16              | 29.14 | 13.23  | 80.58              | 53.70 | 30.36  | 29.39         | 30.73 | 5.92   | 14.83      | 21.10 | 4.93   |
|                    |                   |         |                    |           | (9)                | (9)   | (9)    | (9)                | (9)   | (9)    | (8)           | (6)   | (9)    | (10)       | (9)   | (9)    |
| 10                 | EPIC_TSN_Flow     | 1       | 09/04/18           |           | 42.75              | 17.40 | 9.02   | 79.52              | 39.43 | 21.92  | 21.42         | 13.75 | 2.58   | 15.58      | 9.51  | 2.28   |
|                    |                   |         |                    |           | (8)                | (11)  | (10)   | (10)               | (11)  | (10)   | (10)          | (11)  | (10)   | (9)        | (11)  | (10)   |
| 11                 | EPIC_2SCNN_Flow   | 1       | 09/06/18           |           | 39.00              | 13.93 | 6.01   | 77.03              | 33.98 | 16.90  | 16.33         | 5.59  | 1.10   | 12.19      | 6.47  | 1.32   |
|                    |                   |         |                    |           | (11)               | (12)  | (11)   | (11)               | (12)  | (11)   | (11)          | (12)  | (12)   | (11)       | (12)  | (12)   |
| 12                 | szhang_           | 3       | 03/11/19           |           | 24.23              | 21.80 | 4.76   | 71.46              | 44.22 | 15.74  | 5.87          | 21.82 | 2.00   | 4.86       | 14.72 | 1.47   |
|                    |                   |         |                    |           | (12)               | (10)  | (12)   | (12)               | (10)  | (12)   | (12)          | (10)  | (11)   | (12)       | (10)  | (11)   |
| 13                 | chinmayd          | 1       | 03/22/19           |           | 0.83               | 0.25  | 0.00   | 4.21               | 1.24  | 0.01   | 3.92          | 0.98  | 0.00   | 1.40       | 0.17  | 0.00   |
|                    |                   |         |                    |           | (13)               | (13)  | (13)   | (13)               | (13)  | (13)   | (13)          | (13)  | (13)   | (13)       | (13)  | (13)   |

| Unseen Kitchens (S2) |                   |         |                    |           |                    |       |        |                    |       |        |               |       |        |            |       |        |
|----------------------|-------------------|---------|--------------------|-----------|--------------------|-------|--------|--------------------|-------|--------|---------------|-------|--------|------------|-------|--------|
| #                    | User              | Entries | Date of Last Entry | Team Name | Top-1 Accuracy (%) |       |        | Top-5 Accuracy (%) |       |        | Precision (%) |       |        | Recall (%) |       |        |
|                      |                   |         |                    |           | Verb               | Noun  | Action | Verb               | Noun  | Action | Verb          | Noun  | Action | Verb       | Noun  | Action |
| 1                    | TBN_Ensemble      | 1       | 03/22/19           |           | 54.46              | 30.39 | 20.96  | 81.22              | 55.68 | 39.40  | 32.56         | 21.67 | 10.96  | 27.60      | 25.58 | 13.31  |
|                      |                   |         |                    |           | (1)                | (1)   | (1)    | (1)                | (1)   | (1)    | (1)           | (2)   | (2)    | (1)        | (1)   | (1)    |
| 2                    | TBN_Single_Model  | 1       | 03/22/19           |           | 52.68              | 27.86 | 19.05  | 79.92              | 53.77 | 36.53  | 31.43         | 21.47 | 11.99  | 28.21      | 23.53 | 12.68  |
|                      |                   |         |                    |           | (2)                | (2)   | (2)    | (2)                | (2)   | (2)    | (2)           | (2)   | (1)    | (1)        | (2)   | (2)    |
| 3                    | masterchef        | 1       | 10/02/18           |           | 39.30              | 22.43 | 14.10  | 76.41              | 47.35 | 32.43  | 20.42         | 15.96 | 4.83   | 16.95      | 17.72 | 8.46   |
|                      |                   |         |                    |           | (6)                | (4)   | (3)    | (3)                | (3)   | (3)    | (5)           | (4)   | (6)    | (4)        | (4)   | (3)    |
| 4                    | zolfagha          | 7       | 10/18/18           |           | 43.77              | 21.92 | 12.73  | 74.84              | 44.86 | 26.32  | 24.45         | 19.12 | 8.37   | 19.47      | 18.41 | 7.83   |
|                      |                   |         |                    |           | (3)                | (5)   | (4)    | (4)                | (6)   | (4)    | (4)           | (3)   | (3)    | (3)        | (3)   | (4)    |
| 5                    | EPIC_TSN_Fusion   | 1       | 09/04/18           |           | 39.40              | 22.70 | 10.89  | 74.29              | 45.72 | 25.26  | 22.54         | 15.33 | 6.21   | 13.06      | 17.52 | 6.49   |
|                      |                   |         |                    |           | (5)                | (3)   | (5)    | (6)                | (4)   | (6)    | (4)           | (5)   | (4)    | (6)        | (5)   | (5)    |
| 6                    | EPIC_TSN_RGB      | 1       | 09/04/18           |           | 34.89              | 21.82 | 10.11  | 74.56              | 45.34 | 25.33  | 19.48         | 14.67 | 5.32   | 11.22      | 17.24 | 6.34   |
|                      |                   |         |                    |           | (9)                | (6)   | (6)    | (5)                | (5)   | (5)    | (7)           | (7)   | (5)    | (8)        | (6)   | (6)    |
| 7                    | EPIC_2SCNN_Fusion | 1       | 09/06/18           |           | 36.16              | 18.03 | 7.31   | 71.97              | 38.41 | 19.49  | 18.11         | 15.31 | 3.19   | 10.52      | 12.55 | 3.00   |
|                      |                   |         |                    |           | (8)                | (7)   | (7)    | (9)                | (8)   | (8)    | (8)           | (6)   | (9)    | (9)        | (7)   | (7)    |
| 8                    | EPIC_2SCNN_RGB    | 2       | 09/06/18           |           | 33.12              | 17.58 | 6.79   | 73.23              | 40.46 | 20.42  | 16.06         | 11.97 | 3.39   | 9.44       | 12.53 | 3.01   |
|                      |                   |         |                    |           | (10)               | (8)   | (8)    | (8)                | (7)   | (7)    | (9)           | (8)   | (8)    | (10)       | (8)   | (8)    |
| 9                    | EPIC_TSN_Flow     | 1       | 09/04/18           |           | 40.08              | 14.51 | 6.73   | 73.40              | 33.77 | 18.64  | 19.98         | 9.48  | 2.32   | 13.81      | 8.58  | 2.54   |
|                      |                   |         |                    |           | (4)                | (10)  | (9)    | (7)                | (9)   | (9)    | (9)           | (6)   | (9)    | (10)       | (5)   | (11)   |
| 10                   | zhun              | 4       | 01/09/19           |           | 28.71              | 13.25 | 5.16   | 67.70              | 29.67 | 12.94  | 10.61         | 8.22  | 3.59   | 7.62       | 9.47  | 3.29   |
|                      |                   |         |                    |           | (11)               | (11)  | (10)   | (11)               | (11)  | (11)   | (11)          | (11)  | (7)    | (11)       | (10)  | (7)    |
| 11                   | EPIC_2SCNN_Flow   | 1       | 09/06/18           |           | 37.28              | 11.85 | 4.75   | 71.56              | 28.41 | 14.82  | 14.93         | 2.93  | 1.17   | 11.60      | 6.26  | 2.05   |
|                      |                   |         |                    |           | (7)                | (12)  | (11)   | (10)               | (12)  | (10)   | (10)          | (12)  | (12)   | (7)        | (12)  | (11)   |
| 12                   | szhang_           | 3       | 03/11/19           |           | 17.86              | 14.89 | 2.80   | 64.12              | 31.21 | 8.71   | 5.16          | 8.76  | 1.50   | 4.31       | 9.54  | 1.55   |
|                      |                   |         |                    |           | (12)               | (9)   | (12)   | (12)               | (10)  | (12)   | (12)          | (10)  | (11)   | (12)       | (9)   | (12)   |
| 13                   | chinmayd          | 1       | 03/22/19           |           | 0.89               | 0.31  | 0.03   | 4.17               | 1.23  | 0.03   | 3.79          | 1.37  | 0.38   | 1.88       | 0.43  | 0.02   |
|                      |                   |         |                    |           | (13)               | (13)  | (13)   | (13)               | (13)  | (13)   | (13)          | (13)  | (13)   | (13)       | (13)  | (13)   |

Figure 1: Our submission on the action recognition challenge for Seen (top) and Unseen (bottom) Kitchens.

Table 1 shows a comparison of the performance of the top largest classes against the less represented classes, for individual modalities, and our proposed TBN. The classes are ranked by the number of examples in training, and the results are reported separately for the top-10% classes ver-

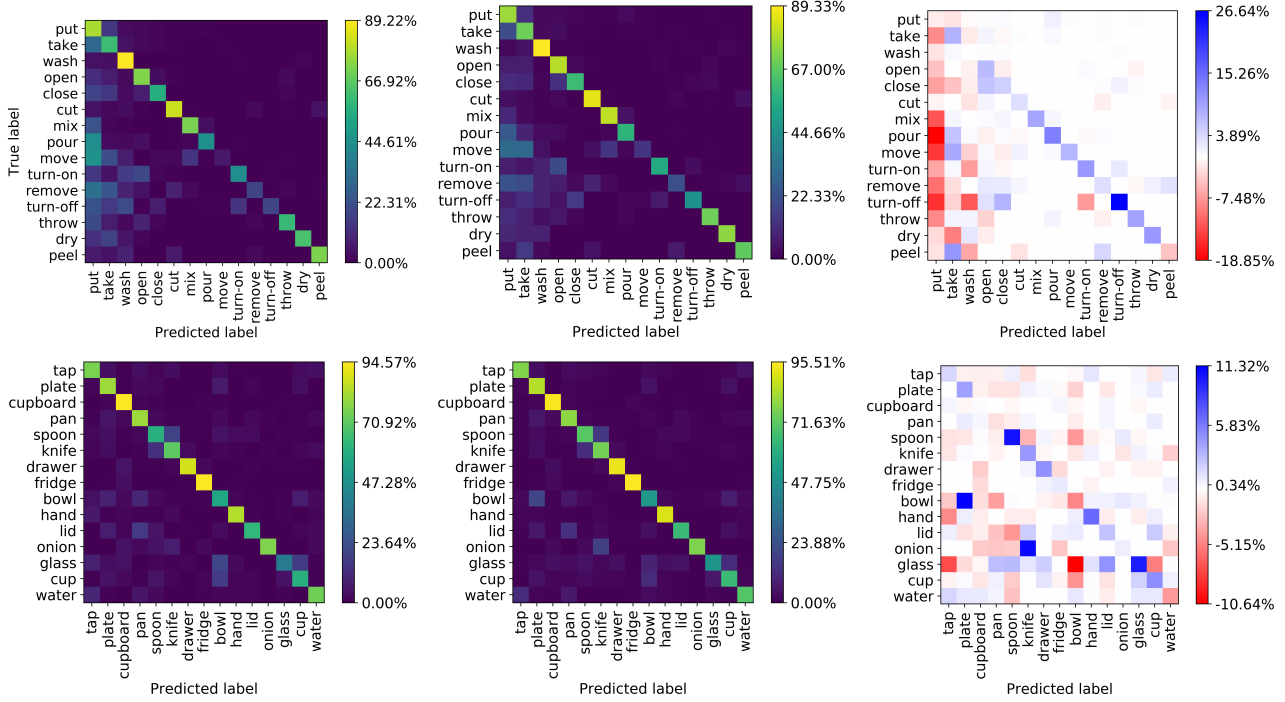

Figure 2: Confusion matrices for largest-15 verb classes (top) and the largest-15 noun classes (bottom), without (left) and with (middle) audio, as well as their difference (right).

|      |         | RGB   | Flow  | Audio | Fusion |
|------|---------|-------|-------|-------|--------|
| Verb | Top-10% | 41.90 | 49.29 | 35.02 | 63.00  |
|      | Tail    | 02.85 | 02.26 | 04.21 | 11.00  |
| Noun | Top-10% | 39.52 | 34.23 | 22.36 | 46.50  |
|      | Tail    | 06.22 | 02.38 | 04.76 | 13.02  |

Table 1: Comparison of mean class accuracy for the top 10% of classes when ranked by class size and the remaining (tail) classes. It can be seen that fusion clearly has a greater effect on the tail classes, where single modalities perform very poorly.

sus the rest which we refer to as *tail classes*. The effect of fusion is more evident on the tail classes, 63% improvement on tail vs. 34% improvement on top-10% for verbs, and 50% improvement on tail vs. 15% improvement on top-10% for nouns. This finding shows that fusion in TBN decreases the effect of the class-imbalance. Furthermore, it is important to note that audio outperforms RGB and flow on the tail verbs.

In Tables 2 and 3, we show per-class accuracies on **S1**, on selected verbs and nouns, respectively. We arrange the chosen set of verbs and nouns in three main categories: **top**: TBN outperforms the best individual modality, **mid**: TBN performs comparably with the best modality, and **bottom**: TBN performs worse than the best individual

|          | RGB   | Flow  | Audio | TBN   |
|----------|-------|-------|-------|-------|
| open     | 63.32 | 66.81 | 51.05 | 79.08 |
| walk     | 55.56 | 11.11 | 55.56 | 88.89 |
| turn-on  | 13.79 | 13.79 | 33.79 | 53.10 |
| scoop    | 02.27 | 04.55 | 02.27 | 18.18 |
| look     | 14.29 | 14.29 | 00.00 | 28.57 |
| scrape   | 25.00 | 00.00 | 16.67 | 25.00 |
| hold     | 00.00 | 20.00 | 00.00 | 20.00 |
| set      | 33.33 | 00.00 | 16.67 | 33.33 |
| cook     | 28.57 | 00.00 | 14.29 | 28.57 |
| finish   | 00.00 | 00.00 | 16.67 | 16.67 |
| insert   | 01.79 | 00.00 | 07.14 | 03.57 |
| divide   | 00.00 | 40.00 | 00.00 | 20.00 |
| sprinkle | 00.00 | 00.00 | 11.11 | 00.00 |
| sample   | 00.00 | 00.00 | 07.14 | 00.00 |
| pat      | 25.00 | 33.33 | 00.00 | 16.67 |

Table 2: Examples of predicted **verbs** on **S1** for each modality individually, and for TBN (Single Model).

modality. We shade the rows reflecting these three groups in the order mentioned above.

A few conclusions could be made from these tables about the advantages of the proposed mid-level fusion:

1. Fusion can improve results when all modalities are individually performing well for both verb and noun

|          | RGB    | Flow  | Audio | TBN   |
|----------|--------|-------|-------|-------|
| paella   | 25.00  | 00.00 | 00.00 | 50.00 |
| fridge   | 83.25  | 80.10 | 60.73 | 87.96 |
| hand     | 56.38  | 59.73 | 43.62 | 76.51 |
| sponge   | 25.27  | 32.97 | 23.08 | 48.35 |
| salt     | 40.98  | 27.87 | 16.39 | 62.30 |
| switch   | 50.00  | 00.00 | 75.00 | 75.00 |
| knife    | 36.29  | 52.12 | 27.80 | 52.12 |
| salad    | 14.29  | 19.05 | 04.76 | 19.05 |
| tortilla | 42.86  | 00.00 | 14.29 | 42.86 |
| leaf     | 00.00  | 10.00 | 10.00 | 10.00 |
| pizza    | 100.00 | 09.09 | 36.36 | 72.73 |
| fish     | 90.00  | 00.00 | 00.00 | 50.00 |
| bowl     | 51.49  | 29.79 | 19.57 | 42.98 |
| chicken  | 31.58  | 15.79 | 07.89 | 26.32 |
| paper    | 03.70  | 00.00 | 14.81 | 07.41 |

Table 3: Examples of predicted **nouns** on **S1** for each modality individually, and for TBN (Single Model).

classes (e.g. ‘open’, ‘fridge’), as well as when all modalities are under-performing (e.g. ‘scoop’, ‘salad’).

2. Fusion can though be difficult at times, particularly when two of the three modalities are uninformative (e.g. ‘divide’, ‘fish’).
3. All nouns for which audio is outperforming other modalities have distinct sounds (e.g. ‘switch’, ‘paper’).
4. Similarly, audio is least distinctive when the noun does not have a sound per se or its sound depends on the action (e.g. ‘chicken’, ‘salt’).

## 4. Code and Models

Python code of our TBN model, and pre-trained model on EPIC-Kitchens is available at <http://github.com/ekazakos/temporal-binding-network>
